1 Title

2 The percentage of Monocytes CD39+ is higher in Pregnant COVID-19 than in Non-  
3 Pregnant COVID-19 patients

4

5 Running title

6 Immune profile in pregnant women with COVID-19

7

8 Authors and institutional affiliations

9 A. Cérbulo-Vázquez<sup>1</sup>, M. García-Espinosa<sup>2</sup>, J.C. Briones-Garduño<sup>3</sup>, L. Arriaga-  
10 Pizano<sup>4</sup>, E. Ferat-Osorio<sup>5</sup>, B. Zavala-Barrios<sup>3</sup>, G.L. Cabrera-Rivera<sup>4</sup>, P. Miranda-Cruz<sup>4</sup>,  
11 M.T. García de la Rosa<sup>4</sup>, J.L. Prieto-Chávez<sup>4,6</sup>, V. Rivero-Arredondo<sup>4</sup>, R.L. Madera-  
12 Sandoval<sup>4</sup>, A. Cruz-Cruz<sup>4</sup>, E. Salazar-Rios<sup>4</sup>, ME Salazar-Rios<sup>4</sup>, D Serrano-Molina<sup>4</sup>, R.  
13 C. De Lira-Barraza<sup>4</sup>, A. H. Villanueva-Compean<sup>7</sup>, A. Esquivel-Pineda<sup>7</sup>, R. Ramirez-  
14 Montes de Oca<sup>7</sup>, F. Caldiño-Soto<sup>8</sup>, L.A. Ramírez-García<sup>9</sup>, G. Flores-Padilla<sup>7</sup>, O.  
15 Moreno-Álvarez<sup>10</sup>, GML Guerrero-Avendaño<sup>11</sup> and C. López-Macías<sup>4,12\*</sup>

16 <sup>1</sup>Departamento de Medicina Genómica, <sup>3</sup>Dirección de Medicina Aguda, Diagnóstico y  
17 Tratamiento, <sup>11</sup>Dirección General. Hospital General de México “Dr. Eduardo Liceaga”.  
18 Ciudad de México, México

19 <sup>2</sup>Servicio de complicaciones de la segunda mitad del embarazo, <sup>8</sup>División Obstetricia.

20 <sup>9</sup>Dirección Médica, <sup>10</sup>Dirección General. UMAE Hospital de Gineco-Obstetricia No. 4  
21 “Dr. Luis Castelazo Ayala”. Instituto Mexicano del Seguro Social (IMSS). Ciudad de  
22 México, México

23 <sup>4</sup>Unidad de Investigación Médica en Inmunoquímica, <sup>5</sup>División de Investigación,

24 <sup>6</sup>Centro de Instrumentos, <sup>7</sup>Medicina Interna. UMAE Hospital de Especialidades, Centro  
25 Médico Nacional Siglo XXI. IMSS. Ciudad de México, México

26 <sup>12</sup>Visiting Professor of Immunology, Nuffield Department of Medicine. University of  
27 Oxford U.K.

28

29 \*Corresponding authors: A. Cérbulo-Vázquez and C. López-Macías.

30 e-mail: [cerbulo@unam.mx](mailto:cerbulo@unam.mx); [constantino@sminmunologia.mx](mailto:constantino@sminmunologia.mx);

31 [constantino.lopez@imss.gob.mx](mailto:constantino.lopez@imss.gob.mx)

32

33

34

35 \*Corresponding authors: Phone: (+52 55) 5627 6915

36

37 Keywords: COVID-19, pregnancy, immunophenotype, cytokine, chemokine.

38

39 **Abstract**

40 Current medical guidelines consider COVID-19 pregnant women a high-risk group.  
41 Physiological gestation down regulates the immunological response to maintain  
42 “maternal-fetal tolerance”; hence, a SARS-CoV-2 infection constitutes a potentially  
43 threatening condition to both the mother and the fetus. To establish the immune profile  
44 in pregnant COVID-19+ patients a cross-sectional study was conducted. Leukocyte  
45 immunophenotype, mononuclear leukocyte response to polyclonal stimulus and  
46 cytokine/chemokine serum concentration were analyzed in pregnant fifteen COVID-  
47 19+ and control groups (fifteen non-pregnant COVID-19+, and thirteen pregnant  
48 COVID-19- women). Pregnant COVID-19+ patients exhibit lower percentages of  
49 monocytes HLA-DR+ compared with control groups. Nevertheless, pregnant COVID-  
50 19+ women show a higher percentage of monocytes CD39+ than controls. Furthermore,  
51 a higher concentration of TNF- $\alpha$ , IL-6, MIP1b and IL-4 was observed within the  
52 pregnant COVID-19+ group. Our result shows that pregnant women express  
53 immunological characteristics that potentially mediate the immune response in COVID-  
54 19.

55

56 **Introduction**

57 The Severe Acute Respiratory Syndrome Coronavirus (SARS-CoV) and Middle East  
58 Respiratory Syndrome Coronavirus (MERS-CoV) infections could result in a high  
59 mortality among pregnant women (25% and 27%, respectively) (1). In 2019, a new  
60 coronavirus called SARS-CoV-2 appeared. Viral infections lead to a powerful cell and  
61 humoral immune response in gestating women, increasing the embryo/fetal-mother  
62 morbidity and mortality (2-4). The immune response in pregnant women is mediated by

63 a diverse number of cellular and humoral mechanisms (5, 6) that result in a unique  
64 biological scenario that these women face when infected with SARS-CoV-2. Moreover,  
65 comorbidities highly prevalent in Mexico, such as obesity, hypertension and diabetes  
66 are associated with critical disease in both general population and pregnant women (3,  
67 4, 7, 8). However, the clinical presentation and symptoms are quite similar between the  
68 general population and pregnant women COVID-19+ (3, 9).

69 In contrast to the epidemiological and clinical evaluation, the immune profile of  
70 pregnant women with COVID-19 has been poorly explored. Similar to the general  
71 population, deep lymphopenia is reported in pregnant women with COVID-19 (10).  
72 Other parameters, such as neutrophil count, are useful for a COVID-19 diagnosis (11).  
73 Furthermore, an increased number of neutrophil/lymphocyte ratio has been associated to  
74 a fatal outcome in COVID-19 patients (12-15). Several studies indicate that leukocyte  
75 count is necessary for the initial evaluation of COVID-19 patients. However, a deeper  
76 analysis of these leukocytes could improve our knowledge of the SARS-CoV2  
77 infection, especially in pregnant women.

78 Cytokines and chemokines are key regulators in the coronavirus infection. SARS-CoV  
79 induces low expression of IFN- $\alpha$ , IFN- $\beta$  and IL-10, as well as a moderate expression of  
80 TNF- $\alpha$  and IL-6 and a high expression of CCL3, CCL5, CCL-2 and CXCL10 (16) (17).

81 In addition, SARS-CoV's protein S induces CCL2 and CXCL8 synthesis *in vitro* (18,  
82 19). Also, several humoral components of the immune response are involved in  
83 COVID-19, among them, inflammatory cytokine/chemokines which have been  
84 observed in high serum concentrations at the general population (20, 21). COVID-19  
85 patients show a higher concentration of IL-2, IL-7, IL-10, G-CSF, IP10 (CXCL-10),  
86 MCP-1 (CCL2), MIP1a (CCL3) and TNF- $\alpha$  compared to non COVID-19 patients (20).

87 The source of these cytokine/chemokines is diverse, and could include lung epithelial  
88 cells, endothelium cells, and leukocytes (22-24).  
89 Exacerbated inflammatory response in pregnancy could disturb the delicate immune  
90 balance, leading to a significant increased morbidity and mortality. To analyze the  
91 immune profile in pregnant women with COVID-19+, a cross sectional study was  
92 executed. Our analysis includes a) immunophenotype of lymphocytes and monocytes  
93 expressing certain activation markers, b) serum cytokine/chemokine concentration, and  
94 total blood challenged against polyclonal stimulus, in presence or absence of Brefeldin-  
95 A, after 4 hours of culture, c) inflammatory cytokines determination, and d) supernatant  
96 cytokine/chemokine concentration. A more detailed picture of the immune map in  
97 pregnant women with COVID-19 could help better understand the pathophysiology of  
98 SARS-CoV-2 infection and improve the quality of healthcare provided to these women  
99 and newborns.

100

## 101 **Material and methods**

### 102 **Patients**

103 This study was conducted by the "Servicio de Ginecología y Obstetricia" at the Hospital  
104 General de Mexico, "Dr. Eduardo Liceaga" in conjunction with the Unidad de  
105 Investigación Médica en Inmunoquímica (UIMIQ), at the Hospital de Especialidades,  
106 Centro Médico Nacional Siglo XXI, and Servicio de complicaciones de la segunda  
107 mitad del embarazo, División Obstetricia. UMAE Hospital de GinecoObstetricia No. 4  
108 "Dr. Luis Castelazo Ayala" (Research project: *DI/20112/04/45*, and *R-2020-785-095*  
109 respectively). After obtaining a signed informed consent letter, forty-four women were  
110 enrolled. Three groups were analyzed: a) Non-pregnant COVID-19 positive (NP-

111 COVID-19+, n=15), b) Pregnant COVID-19 positive (P-COVID-19+, n=16), and c)  
112 Pregnant COVID-19 negative (P-COVID-19-, n=13). SARS-CoV2 viral infection was  
113 confirmed by specific reverse transcription–polymerase chain reaction (RT-PCR). The  
114 COVID-19 diagnosis was based on clinical characteristics (25); comorbidities and  
115 clinical signs or symptoms were registered and shown in Table 1 and 2 respectively.

### 116 **Blood sample collection**

117 Our study is in accordance with the World Medical Association’s Declaration of  
118 Helsinki. After a patient agrees to participate in the study, healthcare personnel  
119 collected blood specimens in silicone coated, EDTA and heparinized tubes (BD  
120 Vacutainer, N.J, USA). Samples were processed immediately after collection. Whole  
121 blood count and serum was obtained to compare among groups.

### 122 **Leukocyte surface immunophenotype**

123 Whole blood samples (50  $\mu$ L) were incubated with titrated volumes of antibodies  
124 according to the following panel: all antibodies were from BioLegend, San Diego, CA,  
125 USA. Anti-CD45-PerCP (Clone:HI30), anti-CD3-AF647 (Clone:UCHT1), anti-CD14-  
126 PECy7 (Clone:M5E2), anti-CD16-FITC (Clone:3G8), anti-CD19-APC/Cy7  
127 (Clone:HIB19), anti-CD73-PE (Clone:AD2), anti-CD39-BV421 (Clone:A1), anti-CD4-  
128 APC/Cy7 (Clone:OKT4), anti-CD8-PE/Dazzle594 or BV510 (Clone:SK1), anti-CD69-  
129 BV421 (Cone:FN50), anti-HLA-DR-AF488 o PE/Dazzle594 (Clone:L243), and for  
130 exclusion of dead cells Zombie Aqua fixable viability kit (BioLegend, San Diego, CA,  
131 USA) were used. After 15 minutes of incubation, erythrolysis was performed using  
132 FACS™ Lysing Solution (Cat. 349202, BD, San Jose, CA, USA). Samples were  
133 washed once with PBS 1x (1,500 rpm, 5 minutes, 4°C), and resuspended in PBS (100  
134  $\mu$ L). At least 30,000 leukocytes were acquired in a FACS Aria IIu flow cytometer (BD

135 Biosciences, San José, CA, USA). The FACS files were analyzed with Infinicyt™  
136 software 1.8 (Cytognos, Salamanca, Spain). Single cells were defined with FSC-A vs.  
137 FSC-H plot, and leukocytes were identified using a SSC vs. CD45 plot. Lymphocytes  
138 were gated as SSC<sup>low</sup>FSC<sup>low</sup>CD45<sup>++</sup>CD14<sup>-</sup>, monocytes as SSC<sup>mid</sup>FSC<sup>mid</sup>CD45<sup>+</sup>CD14<sup>+</sup>,  
139 and granulocytes-neutrophils as SSC<sup>mid</sup>FSC<sup>mid</sup>CD45<sup>+</sup>CD16<sup>+</sup>. Percentage and mean  
140 fluorescence intensity (MFI) of HLA-DR, CD69, CD39, CD73, CD32 and CCR5  
141 positive cells were calculated.

#### 142 **Cell culture**

143 Whole blood (1 mL per well) was incubated (4 hours at 37°C with 5% CO<sub>2</sub>) alone in  
144 24-well culture plates (Cat 13485, Costar, NY, USA), in the presence of human  
145 recombinant IL-6 (human rIL-6, 100 ng/mL), *Escherichia coli* O55: B5  
146 Lipopolysaccharide (LPS 250 ng/mL, Cat. L2880, Sigma Aldrich, St. Louis, MO,  
147 USA), or Phorbol Myristate Acetate/Ionomycin (PMA 50 ng/mL, Ion 1mg/mL). In  
148 addition, two sets of samples were incubated, in the presence or absence of Brefeldin-A  
149 (Cat. 420601, BioLegend, San Diego, CA, USA). Afterwards, either intracellular  
150 phenotyping was performed, or supernatant was recovered and stored at -20°C until  
151 cytokine and chemokine assessment.

#### 152 **Intracellular cytokine immunophenotype**

153 After cell culture, whole blood samples (50 µL) were incubated with the following  
154 panel: antibodies from BioLegend, San Diego, CA, USA: anti-CD45-PerCP (Clone:  
155 HI30), anti-CD3-AF647 (Clone: UCHT1), anti-CD14-PECy7 (Clone: M5E2), anti-  
156 CD4-APC/Cy7 (Clone: OKT4), anti-CD8-PE/Dazzle594 or BV510 (Clone: SK1). After  
157 15 min in the dark, blood was washed once with PBS (1mL) by centrifugation at 900×g  
158 for 5 min at RT, then Fixation buffer was added (100 µL, Cat: 420801, BioLegend, San

159 Diego, CA, USA), and incubated for 20 min. Samples were then washed twice with 1  
160 mL of Intracellular Staining Perm Wash buffer (Cat: 421002, BioLegend, San Diego,  
161 CA, USA); after the second wash, they were mixed with monoclonal antibodies against  
162 cytokines from BioLegend, San Diego, CA, USA: anti-TNF $\alpha$ -BV421 (Clone: MAb11),  
163 anti-IL-6-PE (MQ2-13A5), anti-IL-1 $\beta$ -FITC (Clone:JK1B-1), anti-IFN $\gamma$ -BV421  
164 (Clone:4S.B3), anti-IL-8a-PE (Clone: E8N1). For the exclusion of dead cells Zombie  
165 Aqua fixable viability kit (BioLegend, San Diego, CA, USA) was adjoined and  
166 incubated for 30 min dRT. Lastly, the mixture was washed once with PBS. At least  
167 30,000 events were acquired in a FACS Aria IIu (BD, San Jose CA) flow cytometer.  
168 Analysis was performed using the Infinicyt™ Software 1.8.

#### 169 **Serum or supernatant cytokine/chemokines concentration**

170 Serum or cell culture supernatant was analyzed as follows; cytokines (IL-2, IL-4, IL-6,  
171 IL-10, TNF- $\alpha$ , IFN- $\gamma$ , and IL-17a) and chemokines (CXCL8/IL-8, CXCL10/IP-10,  
172 CCL11/Eotaxin, CCL17/TARC, CCL2/MCP-1, CCL5/RANTES, CCL3/MIP-1a,  
173 CXCL9/MIG, CXCL5/ENA-78, CCL20/ MIP-3a, CXCL1/GRO $\alpha$ , CXCL11/I-TAC and  
174 CCL4/MIP-1b) were determined using bead based immunoassays (CBA kit, Cat.  
175 560484, BD PharMingen, San Diego, CA, USA; and LEGENDplex, Cat. 740003,  
176 BioLegend, San Diego, CA, USA). Log-transformed data were used to construct  
177 standard curves fitted to 10 discrete points using a 4-parameter logistic model. The  
178 concentration of each cytokine/chemokine was calculated using interpolations of their  
179 corresponding standard curves.

#### 180 **Statistical analysis**

181 Statistical analysis was performed using GraphPad Prism® version 7 software  
182 (GraphPad Software, San Diego, CA, USA). Non-parametric ANOVA test (Kruskall-

183 Wallis test) with Dunn post-test were applied. Categorical variables were expressed as  
184 percentage number (%) and compared by Fisher's exact test. A  $p < 0.05$  was considered  
185 as statistically significant.

186

## 187 **Results**

188 To assess the immune profile in pregnant women infected with SARS-CoV-2, we  
189 analyzed; a) NP-COVID-19+, b) P-COVID-19+ and c) P-COVID-19-. Table 1 shows  
190 the clinical characteristics and laboratory values. No statistically significant difference  
191 was observed for age, BMI, respiratory rate, body temperature, Mean Arterial Pressure  
192 (MAP), hemoglobin, total leukocyte count, Neutrophil/Lymphocyte Ratio (NLR), total  
193 platelet count, serum glucose, serum creatinine, Partial Thromboplastin Time and  
194 fibrinogen between the NP-COVID-19+ or P-COVID-19- groups vs. P-COVID-19+.  
195 We did not observe any difference in the leukocyte count among groups, this is  
196 consistent after phenotyping analysis by flow cytometry (Table S1). Furthermore, the  
197 frequency of comorbidity (diabetes mellitus and systemic arterial hypertension) was  
198 similar among the groups. On the other hand, some clinical characteristics display  
199 differences, for example, heart rate was higher in P-COVID-19+ than in P-COVID-19-  
200 patients ( $p=0.048$ ). Likewise, serum Lactate Dehydrogenase (LDH) concentration was  
201 higher in P-COVID-19+ than in P-COVID-19- group. Nevertheless, patients in the P-  
202 COVID-19- group maintain higher oxygen saturation levels than in COVID-19+  
203 patients with or without pregnancy. Regarding serum D-dimer concentrations, higher  
204 magnitudes were reported in P-COVID-19+ than in NP-COVID-19+. It is worthy of  
205 highlighting that a SARS-CoV-2 infection does not increase the D-dimer concentration



206 to the levels reported in physiological pregnancy. Similar gestational age, and number  
 207 of cases per trimester were analyzed in pregnant women.

208

209 **Table 1. Clinical and laboratory characteristics.**

|                                               | <b>NP-COVID-19 +<br/>(n=9-15)a</b> | <b>P-COVID-19<br/>+<br/>(n=8-15)b</b> | <b>P-COVID-19<br/>-<br/>(n=13)c</b> | <b>p</b>                                             |
|-----------------------------------------------|------------------------------------|---------------------------------------|-------------------------------------|------------------------------------------------------|
| <b>Age (years)</b>                            | 34.1±7                             | 28±7.1                                | 25.6±5.7                            | a vs. c<br>0.006                                     |
| <b>BMI</b>                                    | 31.6±6.9                           | 30.0±6.3                              | 28.0±3.5                            | 0.356                                                |
| <b>Respiratory Rate<br/>(breaths per min)</b> | 23±3.8                             | 22.1±6.8                              | 18.6±1.1                            | a vs. c<br>0.005                                     |
| <b>Heart Rate<br/>(beats per min)</b>         | 91.2±25.1                          | 97.3±19.6                             | 77.7±7.5                            | <b>b vs. c</b><br><b>0.048</b>                       |
| <b>Temperature (°C)</b>                       | 36.9±1.2                           | 36.7±0.7                              | 36.3±0.2                            | 0.081                                                |
| <b>Mean Arterial<br/>Pressure (mmHg)</b>      | 159.5±17.4                         | 153.2±15.4                            | 157.1±13.3                          | 0.631                                                |
| <b>Hemoglobin</b>                             | 13±2.7                             | 12.6±2.0                              | 11.9±1.1                            | 0.070                                                |
| <b>Leukocytes<br/>(10xmm<sup>3</sup>)</b>     | 8.6±4                              | 11.1±3.2                              | 8.4±2.3                             | 0.140                                                |
| <b>NLR</b>                                    | 11.8±11.7                          | 5.1±1.9                               | 3.7±1.2                             | a vs. c<br>0.007                                     |
| <b>PLT (10xmm<sup>3</sup>)</b>                | 272.3±99.2                         | 327.2±218.1                           | 232.8±45.4                          | 0.548                                                |
| <b>Glucose (mg/dL)</b>                        | 122.5±51.8                         | 91.1±20.1                             | 89.3±12.5                           | 0.170                                                |
| <b>Urea (mg/dL)</b>                           | 30.9±20.4                          | 17.4±5.7                              | 18.3±5.9                            | <b>a vs. b</b><br><b>0.040</b><br>a vs. c<br>0.027   |
| <b>Creatinin (mg/dL)</b>                      | 0.7±0.3                            | 1.0±1.1                               | 0.5±0.2                             | a vs. c<br>0.009                                     |
| <b>LDH (U/L)</b>                              | 804.9±1389                         | 582.8±510.8                           | 269.7±90.4                          | <b>b vs. c</b><br><b>0.005</b>                       |
| <b>PT (seconds)</b>                           | 15.2±3.3                           | 11.5±1.1                              | 11±0.4                              | <b>a vs. b</b><br><b>0.011</b><br>a vs. c<br>0.0002  |
| <b>PTT (seconds)</b>                          | 31.2±4.6                           | 30.9±4                                | 29.5±3.3                            | 0.595                                                |
| <b>D-Dimer (ng/mL)</b>                        | 3.9±6.9                            | 1513±1474                             | 3215±1247                           | <b>a vs. b</b><br><b>0.028</b><br>a vs. c<br><0.0001 |
| <b>Fibrinogen<br/>(mg/dL)</b>                 | 662.7±167.5                        | 693.9±186.3                           | 566.2±103.4                         | 0.195                                                |
| <b>Oxygen saturation<br/>(%)</b>              | 88.4±13.3                          | 91.1±5.6                              | 98.5±0.5                            | <b>0.049</b>                                         |
| <b>Diabetes</b>                               |                                    |                                       |                                     |                                                      |
| Gestational                                   | 2                                  | 3                                     | 1                                   | 0.614                                                |
| Type II                                       |                                    |                                       |                                     |                                                      |
| <b>Hypertension</b>                           | 1                                  | 2                                     | 0                                   | 0.375                                                |

|                                 |    |          |          |              |
|---------------------------------|----|----------|----------|--------------|
| <b>Obesity</b>                  | 5  | 6        | 0        | <b>0.037</b> |
| <b>Gestational age (Weeks)</b>  | -- | 31.4±5.7 | 35.3±4.8 | 0.069        |
| <b>1<sup>st</sup> trimester</b> | -- | 0        | 0        | ns           |
| <b>2<sup>nd</sup> trimester</b> | -- | 2        | 1        | ns           |
| <b>3<sup>rd</sup> trimester</b> | -- | 13       | 12       | ns           |

210 Non-Pregnant COVID-19+ (NP-COVID-19+), Pregnant-COVID-19+ (P-COVID-19+), Pregnant-  
 211 COVID-19- (P-COVID-19-). BMI; Body Mass Index. NLR; Neutrophil/Lymphocyte Ratio. Kruskal-  
 212 Wallis test and Dunn's multiple comparisons test. Significant  $p < 0.05$ . Media±SD.  
 213

214 Table 2 shows the frequency of symptoms exhibited by patients with and without  
 215 COVID-19. Despite gestation, patients with COVID-19 had a similar frequency of  
 216 symptoms such as cough, myalgia, arthritis and anosmia. The most frequent symptoms  
 217 in pregnant patients with COVID-19 were: cough, myalgia, and arthralgia.

218  
 219

**Table 2. Frequency of COVID-19 signs and symptoms.**

|                    | <b>NP-COVID-19 +<br/>(n=15)<sup>a</sup></b> | <b>P-COVID-19 +<br/>(n=13)<sup>b</sup></b> | <b>P-COVID-19 -<br/>(n=12)<sup>c</sup></b> | <b><i>p</i></b> |
|--------------------|---------------------------------------------|--------------------------------------------|--------------------------------------------|-----------------|
| <b>Cough</b>       | 10                                          | 9                                          | 0                                          | <b>0.001</b>    |
| <b>Rhinorrhea</b>  | 4                                           | 6                                          | 0                                          | <b>0.038</b>    |
| <b>Odynophagia</b> | 5                                           | 3                                          | 0                                          | 0.092           |
| <b>Myalgia</b>     | 10                                          | 8                                          | 0                                          | <b>0.001</b>    |
| <b>Arthralgia</b>  | 7                                           | 7                                          | 0                                          | <b>0.012</b>    |
| <b>Anosmia</b>     | 2                                           | 1                                          | 0                                          | 0.417           |
| <b>Dyspnea</b>     | 11                                          | 6                                          | 0                                          | <b>0.0006</b>   |
| <b>Diarrhea</b>    | 3                                           | 1                                          | 0                                          | 0.202           |

220 Non-Pregnant COVID-19+ (NP-COVID-19+), Pregnant-COVID-19+ (P-COVID-19+), Pregnant-  
 221 COVID-19- (P-COVID-19-). Fisher's exact test. Significant  $p < 0.05$ .  
 222

223 Cellular immune response is essential against SARS-CoV-2 infection. Using flow  
 224 cytometry, the proportion of leukocytes with an activated phenotype (HLA-DR+ or  
 225 CD69+) or inflammatory regulators (CD39+ or CD73+) was determined in peripheral  
 226 blood samples from the three groups by phenotyping, as described in the methods, and  
 227 were compared among each other. Figure 1 shows the lower proportion of monocytes

228 HLA-DR<sup>+</sup> found in P-COVID-19<sup>+</sup> compared to P-COVID-19<sup>-</sup> patients (p=0.006).  
229 Along the same line, a lower percentage of monocytes HLA-DR<sup>+</sup> was observed in NP-  
230 COVID-19<sup>+</sup> than in P-COVID-19<sup>-</sup> group (p=0.0003), while NP-COVID-19<sup>+</sup> and P-  
231 COVID-19<sup>+</sup> show similar percentage of monocytes HLA-DR<sup>+</sup>. In contrast, the  
232 percentage of CD4 or CD8 T lymphocytes that express HLA-DR or the early activation  
233 marker (CD69) were similar among groups (Table S2).  
234 Regarding CD39, the percentage of monocytes CD39<sup>+</sup> was lower in the NP-COVID-  
235 19<sup>+</sup> than in the P-COVID-19<sup>+</sup> group (p=0.004), a lower percentage was noticed in NP-  
236 COVID-19<sup>+</sup> than in P-COVID-19<sup>-</sup> group; however, this difference was not statistically  
237 significant (p = 0.663). A tendency in P-COVID-19<sup>+</sup> women to express higher  
238 percentage of monocytes CD39<sup>+</sup> compared to non-infected gestating women (p=0.084)  
239 was observed. CD39 expression was furthermore determine in B and T lymphocytes,  
240 noticing a higher percentage of B CD39<sup>+</sup> cells in P-COVID-19<sup>+</sup> and P-COVID-19<sup>-</sup>  
241 compared to NP-COVID-19<sup>+</sup> group, but these differences were not statistically  
242 significant (p=0.127, p=0.487, respectively). On the other hand, T CD39<sup>+</sup> cells are  
243 higher in NP-COVID-19<sup>+</sup> than in P-COVID-19<sup>+</sup> or P-COVID-19<sup>-</sup> groups, although  
244 these differences were not significant (p=0.201, p=0.057 respectively). With respect to  
245 CD73, it was found that monocytes CD73<sup>+</sup> reached a higher percentage in NP-COVID-  
246 19<sup>+</sup> than in P-COVID-19<sup>+</sup> group (p=0.029), while, the NP-COVID-19<sup>+</sup> and P-COVID-  
247 19<sup>-</sup> show a very similar percentage of monocytes CD73<sup>+</sup> (p> 0.999). Despite pregnancy  
248 or COVID-19 similar percentages of CD73<sup>+</sup> in B cells were detected. In contrast, the  
249 percentage of T CD73<sup>+</sup> cells were lower in NP-COVID-19<sup>+</sup> than in P-COVID-19<sup>-</sup>  
250 (p=0.038), but similarly low between COVID-19<sup>+</sup> women regardless of their  
251 gestational status (p=0.227).

252

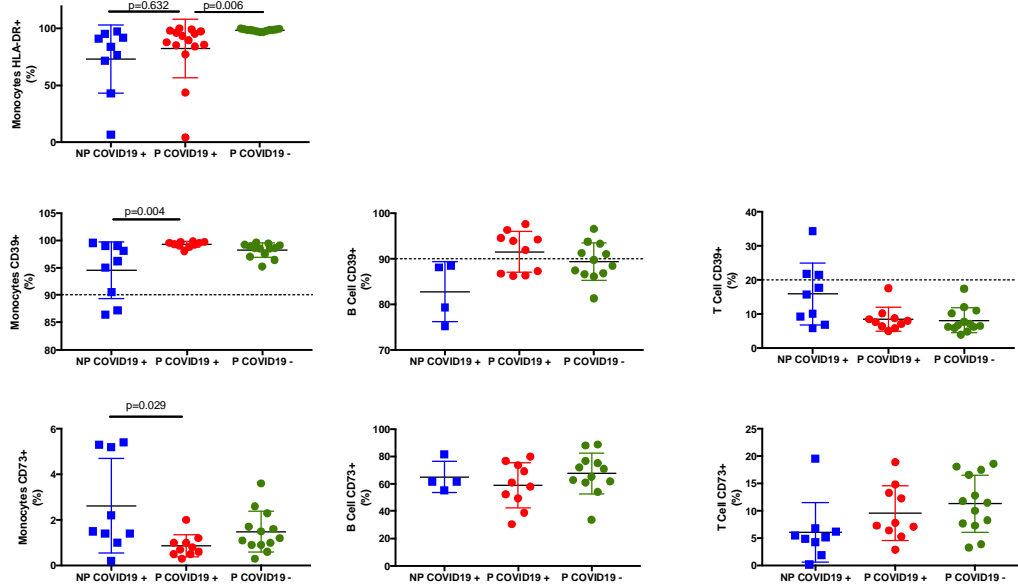

253

254

255

256

257

258

259

260

**Figure 1. Surface marker on leukocytes.** Whole blood cells were immunophenotype as described in methods. Results are expressed as mean±SD. Significance value was  $p < 0.05$ . Kruskal-Wallis and Dunn's multiple comparisons test was calculated. Non-Pregnant COVID-19 positive (NP-COVID-19+, n=4-9). Pregnant-COVID-19 positive (P-COVID-19+, n=10-15). Pregnant-COVID-19 negative (P-COVID-19-, n=12-13). Dot line indicates the percentage of monocytes, B and T cells that constitutively express CD39 (26).

261

262

263

264

265

266

267

268

269

270

271

The proportion of lymphocytes and monocytes that synthesize cytokines IL-6, IFN- $\gamma$  or IL-1 $\beta$  was determined in P-COVID-19+ patients. Whole blood samples were cultivated 4 hours in absence or presence of polyclonal stimuli (LPS 250 ng/mL, PMA/Ion, 50ng/mL/1mg/mL) or human rIL-6 (100 ng/mL). Figure 2 shows the results of this functional assay. The percentage of CD4 or CD8 T lymphocytes expressing IL-6 or IFN- $\gamma$  was less than 5% in the groups (Figure 2a, d, g, j), and human rIL-6 did not increase this percentage in CD4 or CD8 T lymphocytes (Figure 2b, e, h, k). The stimulus with PMA/Ion did increase the percentage of CD4 IL-6+ T lymphocytes in the P-COVID-19+ group with respects to the P-COVID-19- group. However, this effect was not seen in the CD8+ IL-6+ T lymphocytes (Figure 2c, i). In addition, PMA/Ion stimulus increased the percentage of CD4 and CD8 IFN- $\gamma$ + cells in total blood of

272 pregnant women with and without COVID-19 (Figure 2f, l), but statistical significance  
273 is only reached in CD8 IFN- $\gamma$ + T lymphocytes between the P-COVID-19+ and P-  
274 COVID-19- groups ( $p=0.019$ , Figure 2l).

275 By the same token, the percentage of monocytes IL-1+ or IL-6+ is less than 10% in the  
276 groups (Figure 2m, p). The stimulus with human rIL-6 only increased the percentage of  
277 monocytes IL-6+ in the P-COVID-19- group with respect to P-COVID-19+ (Figure 2q),  
278 but the percentage of monocytes IL-1+ was similar among groups (Figure 2n).  
279 Incubation with LPS increased the proportion of monocytes IL-1+ and IL-6+ in the  
280 three groups (Figure 2o, r), with no significant differences among groups. A lower  
281 percentage of monocytes IL-1+ was observed in pregnant women with and without  
282 COVID-19 than in NP-COVID-19+(Figure 2o,  $p=0.314$  and  $p=0.213$  respectively). In  
283 addition, the percentage of monocytes IL-6+ in patients with COVID-19+ with and  
284 without pregnancy was similar (Figure 2r). After the LPS challenge, we documented a  
285 lower percentage of monocytes IL-6+ in P-COVID-19- than in P-COVID-19+ group,  
286 even so, this difference is not statistically significant ( $p=0.724$ ).

287

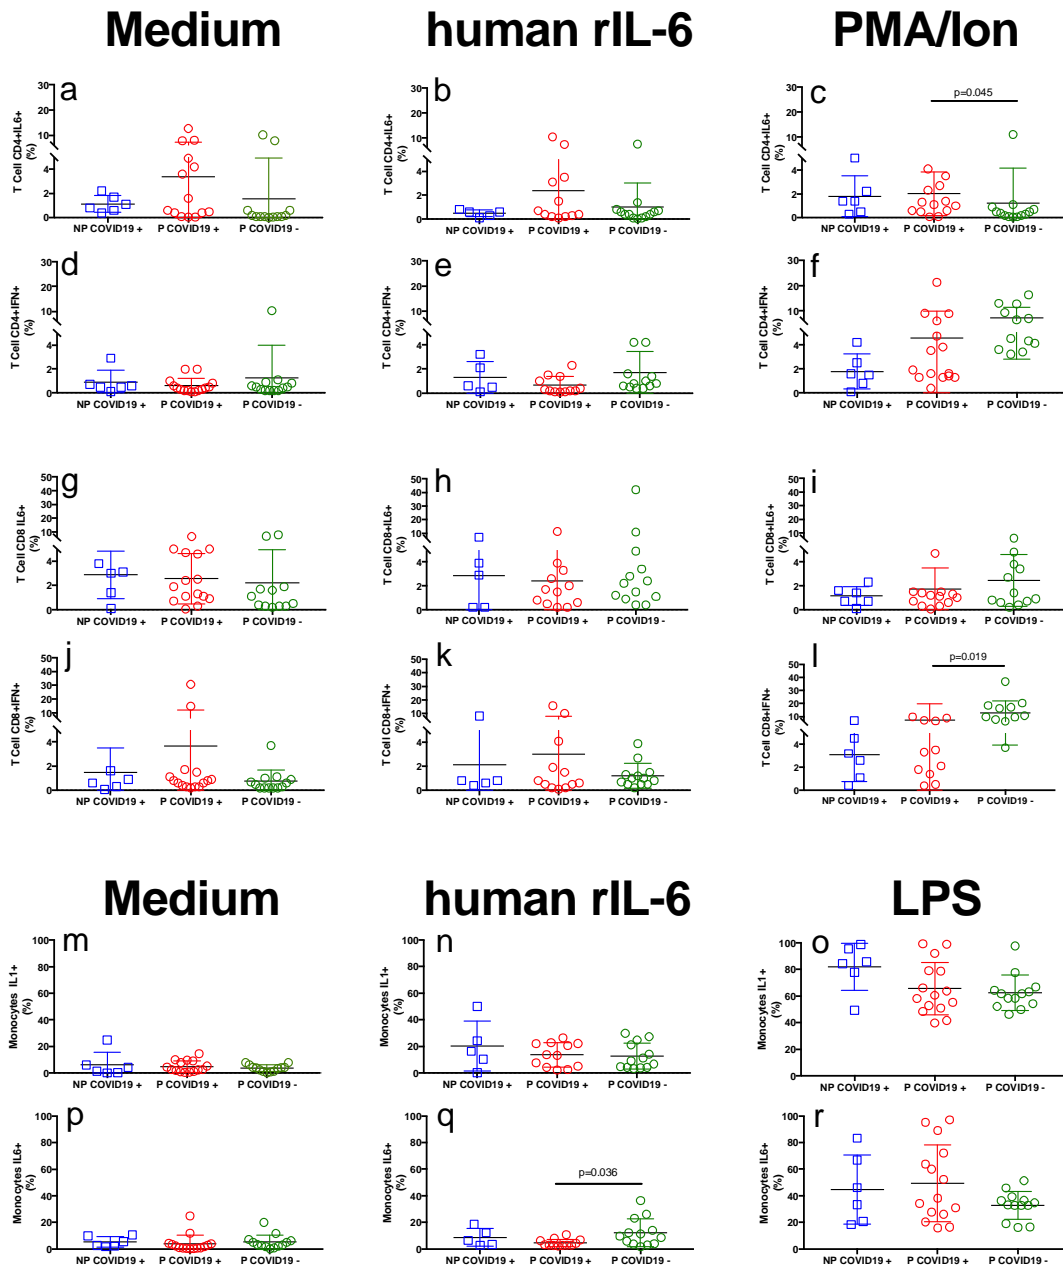

288

289

290

291

292

293

294

295

296

297

**Figure 2. Percentage of cytokine-positive leukocytes.** Whole blood cells were immunophenotype as described in methods. Results are expressed as mean±SD. Significance value was  $p < 0.05$ . Kruskal-Wallis and Dunn's multiple comparisons test was calculated. Non-Pregnant COVID-19 positive (NP-COVID-19+, n=5-6). Pregnant-COVID-19 positive (P-COVID-19+, n=12-15). Pregnant-COVID-19 negative (P-COVID-19-, n=12-13).

To determine the serum concentration of cytokine/chemokine in pregnant women with COVID-19+, samples were collected and compared with controls (NP-COVID-19+ and P-COVID-19-). The MIP1b, TNF- $\alpha$ , IL-6 and IL-4 concentration is higher in P-

298 COVID-19+ than in P-COVID-19- (Figure 3a, b, d, e). Also, the TNF and IL-4  
299 concentration is higher in P-COVID-19+ than in NP-COVID-19+ (Figure 3d, e). Other  
300 cytokine/chemokine show higher concentration in P-COVID-19+ than in P-COVID-19-  
301 , such as CXCL10 (IP10) and IL-2, although these do not reach a statistically significant  
302 difference (Figure 3c and f,  $p = 0.456$ , and  $p=0.447$ , respectively). Figure S1 shows  
303 other cytokine/chemokine that show similar concentration between and among groups,  
304 these includes CXCL8, CCL11, CCL17, CCL2, CCL5, CCL3, CXCL9, CXCL5,  
305 CCL23, CXCL1, CXCL11, IL-17a, IFN- $\gamma$  and IL-10.

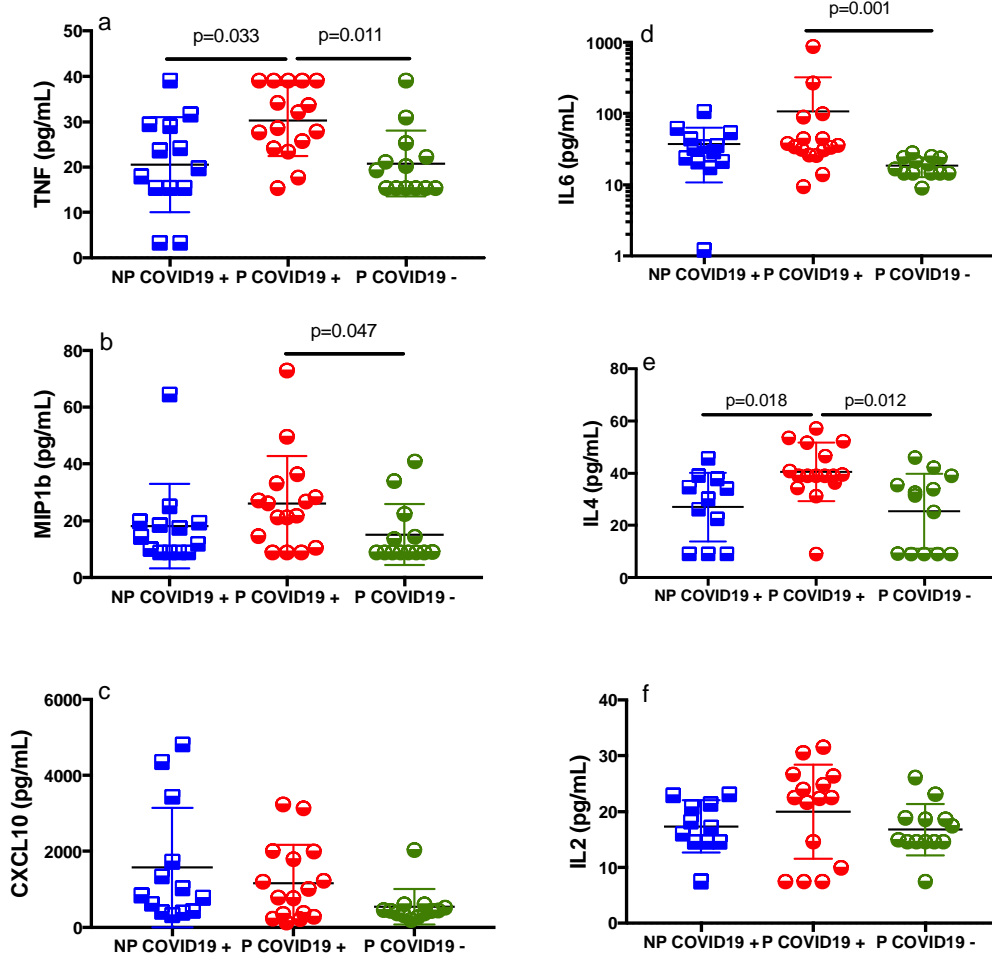

306  
307  
308  
309  
310

**Figure 3. Cytokine/Chemokine serum concentration.** Serum was isolated and cytokine/chemokines concentration was determined using bead-based immunoassays as described in methods. Results are expressed as mean $\pm$ SD. Significance value was  $p<0.05$ . Kruskal-Wallis and Dunn's multiple comparisons

311 test was calculated. Non-Pregnant COVID-19 positive (NP-COVID-19+, n=13). Pregnant-COVID-19  
312 positive (P-COVID-19+, n=14-15). Pregnant-COVID-19 negative (P-COVID-19-, n=13).  
313  
314 To know whether leukocytes from pregnant women with COVID-19 can be activated  
315 by polyclonal confrontation and lead to cytokine/chemokine response, whole blood was  
316 challenged; Figure 4 shows the concentration in supernatant. After 4 hours of culture  
317 without stimulation (whole blood only), the concentration of TNF- $\alpha$ , IFN- $\gamma$ , CCL3,  
318 CCL4, IL-17a, CCL23, CXCL8 and IL-10 was similar among groups. Human rIL-6  
319 induced a higher concentration of TNF- $\alpha$ , CCL3 and CCL4 (Figure 4e, f, d, h), but only  
320 TNF- $\alpha$  and CCL3 reached a difference statistically significant (Figure 4a, b). Also, LPS  
321 induced a higher concentration of TNF- $\alpha$ , CCL3, CCL4, CCL23 and CXCL8 in all  
322 groups, these differences reached high significance ( $p < 0.0001$ ) when contrasted with  
323 their respective pair without stimulus (in example; NP-COVID-19+ whole blood vs. P-  
324 COVID-19+ LPS). Finally, the stimulation with PMA/Ion induced a higher  
325 concentration of CCL3, CCL4, IL-17a, CCL23, CXCL-8 and IL-10 in all groups rather  
326 than in their respective pair without stimulus (in example; NP-COVID-19+ WB vs. P-  
327 COVID-19+ PMA/Ion). The PMA/Ion did not induce an increase IFN- $\gamma$  response in all  
328 groups, especially in NP-COVID-19+ group, however, the IFN- $\gamma$  concentration was  
329 higher in the pregnancy groups with and without COVID-19 compared to NP-COVID-  
330 19+ group, although no statistically significant difference was achieved ( $p > 0.9$ ,  $p > 0.9$   
331 respectively). Figure S2 shows that the polyclonal stimulus did not induce an increase  
332 response of CXCL10, CCL11, CCL17, CCL2, CCL5, CXCL9, CXCL5, CXCL1,  
333 CXCL11, IL-10, IL-4 and IL-2.  
334



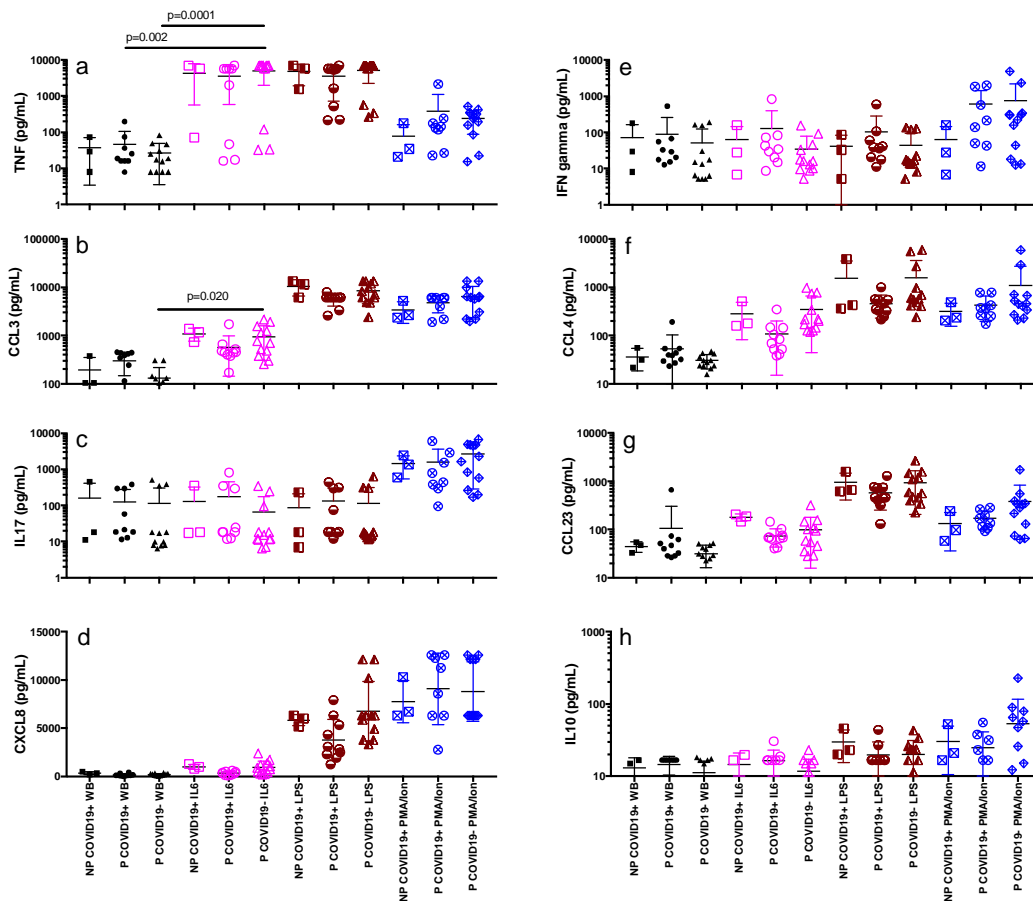

335  
 336 **Fig 4. Cytokine/Chemokine response after 4 hours of culture with polyclonal stimulus in pregnant**  
 337 **and non-pregnant women with or without COVID-19.** Supernatant was collected and cytokines/  
 338 chemokines concentration was determined using bead-based immunoassays as described in methods.  
 339 Results are expressed as mean±SD. Significance value was  $p < 0.05$ . Kruskal-Wallis and Dunn's multiple  
 340 comparisons test was calculated. Non-Pregnant COVID-19 positive (NP-COVID-19+, n=3). Pregnant-  
 341 COVID-19 positive (P-COVID-19+, n=8-10). Pregnant-COVID-19 negative (P-COVID-19-, n=12). WB,  
 342 Whole Blood.

343

## 344 Discussion

345 During pregnancy, the immune system is highly regulated. Multiple mechanisms of  
 346 immune tolerance develop during gestation, and favor physiological progress in  
 347 reproduction (6). Any viral infection poses a high risk of embryo/fetal-maternal morbi-  
 348 mortality, as a result of deregulated cellular and humoral immune response immunity,  
 349 especially during SARS-CoV-2 infection. Villar et al, reported a greater probability of  
 350 morbidity and mortality in pregnant women with COVID-19 than in pregnant women

351 without the disease (2). However, how the immune response is involved is unknown in  
352 great detail. Herein we explored certain cellular and humoral characteristics that may  
353 enhance the understanding of the immuno-pathophysiology in pregnant women with  
354 COVID-19.

355 Pregnant women with COVID-19 were analyzed and compared with non-pregnant  
356 women with COVID-19 or those during physiological pregnancy. NP-COVID-19+ and  
357 P-COVID-19+ groups were similar in several clinical characteristics such as, BMI,  
358 respiratory and heart rate, temperature, MAP, hemoglobin, total platelet count, serum  
359 glucose, serum creatinine, LDH and fibrinogen (Table 1). These results indicate that the  
360 series of cases analyzed had comparable clinical status. However, some differences  
361 between non-pregnant and pregnant women to highlight are: a higher serum urea  
362 concentration, the longer PT time and the lower concentration of D-Dimer in NP-  
363 COVID-19+ than in P-COVID-19+ or P-COVID-19-. Such differences could be due to  
364 the physiological change in the coagulation system during pregnancy (27), and not due  
365 to the SARS-CoV-2 infection, moreover, there is a very few reports of COVID-19  
366 coagulopathy during pregnancy(28). A high D-Dimer concentration has been previously  
367 reported in the general population as well as in pregnant women with COVID-19  
368 correlating its high levels with fatal outcomes (29-31). Interestingly, within this analysis  
369 there was no higher concentration of D-Dimer in P-COVID-19+ compared with P-  
370 COVID-19- patients suggesting that, unlike in the general population, D-Dimer  
371 concentrations in pregnant women are not necessarily indicative of severity or  
372 thromboembolic risk but rather a physiological state of gestation by itself (32). It is  
373 necessary to increase the number within a longitudinal study to assess the usefulness of  
374 D-Dimer concentration as a severity predictor factor in pregnant COVID-19+ women.

375 Additionally, the frequency of symptoms was similar between NP-COVID-19 and P-  
376 COVID-19 (Table 2), indicating a homogeneous clinical presentation, allowing the  
377 identification of cellular and humoral characteristics in response against COVID-19 in  
378 the presence or absence of pregnancy.

379 Our study shows that the percentage of monocytes HLA-DR+ is lower in COVID-19+  
380 women with and without pregnancy than in P-COVID-19- (Fig 1). Also, a lower  
381 percentage has been observed in septic patients with critical condition or fatal outcome  
382 (33, 34), suggesting that this characteristic could be a helpful biomarker in COVID-19.

383 The lower percentage of monocytes HLA-DR+ in COVID-19 could be the way to  
384 downregulate the immune response by SARS-CoV-2 and to evade the immunity, or the  
385 way that the immune response control activation and avoid over-stimulation. Our results  
386 suggest that COVID-19 does not accentuate the low percentage of monocytes HLA-  
387 DR+, which would indicate that pregnancy does not limit the activation of monocytes in  
388 peripheral blood upon a SARS-CoV-2 infection. More analysis is required to know the  
389 biological significance of lower percentage of monocytes HLA-DR+ in COVID-19.

390 Furthermore, a high percentage of lymphocytes CD69+ is reached in AH1N1 influenza,  
391 another viral challenge that leads to unregulated inflammation in pregnant women (35).

392 Likewise, we found a higher percentage of CD69+ cells in both CD4 and CD8 cells in  
393 P-COVID-19+ than in NP-COVID-19+ and P-COVID-19- without reaching a statistical  
394 significance (Table S2). This indicates a higher level of activation despite the multiple  
395 mechanisms to ensure an immunotolerance during pregnancy.

396 The expression of CD39 and CD73 on leukocytes may be an important mechanism for  
397 resolving SARS-CoV-2 infection and COVID-19 disease. CD39 and CD73 are  
398 ectoenzymes that sequentially metabolize ATP to adenosine (26, 36), thus controlling

399 inflammation through this alarmine, leading to an adenosine induced anti-inflammatory  
400 response (26). Pregnant women with or without COVID-19 maintain higher percentages  
401 of monocytes CD39+, and lower percentage of CD73+ than in NP-COVID-19+ (Fig 1),  
402 suggesting that pregnant women control inflammation through monocytes  
403 CD39+/CD73+. These could be a potential marker to monitor the evolution of COVID-  
404 19. The function of CD39/CD73 is not limited to monocytes, however, our results  
405 indicate that the percentage of B or T cells CD39+ or CD73+ is not significantly  
406 modified by the effects of pregnancy or COVID-19 infection (Figure 1).

407 Activated leukocytes are a potential source of pro-inflammatory or regulatory cytokines  
408 in peripheral blood of COVID-19 patients. We determined the percentage of leukocytes  
409 IL-6+, IFN- $\gamma$ + or IL-1 $\beta$ + after 4 hours of culture with or without polyclonal stimulation.  
410 Lymphocytes T CD4+ IL-6+ or IFN- $\gamma$ +, CD8+IL-6+ or IFN- $\gamma$ + and monocytes IL-1 $\beta$ +  
411 or IL-6+ did not reach more than 5% of circulating cells, indicating a low baseline of  
412 circulating cytokine producing leukocytes. After being stimulated with human rIL6,  
413 there was no significant increase of IL-1 $\beta$ , IL-6 or IFN- $\gamma$  producers in lymphocytes and  
414 monocytes, indicating that the IL-6 in serum of COVID-19 patients could have a limited  
415 stimulus to increase the synthesis of pro-inflammatory cytokines from circulating  
416 leukocytes. Whole blood stimulation LPS or PMA/Ion increases the percentage of  
417 lymphocytes T CD4+ and CD8+ and monocytes IFN- $\gamma$ + or IL-1 $\beta$ + and IL-6+,  
418 indicating that these leukocytes are not anergic and retain the ability to synthesize  
419 cytokines both in the presence and absence of pregnancy and COVID-19. However,  
420 there is a trend to increase the percentage of monocytes IL-6+ and decrease the  
421 percentage of lymphocytes CD4+IFN- $\gamma$ + and CD8+IFN- $\gamma$ + in patients with COVID-19.

422 This suggests that both women with or without pregnancy develop quite similar  
423 defenses to face COVID-19, increasing IL-6 and limiting IFN- $\gamma$  response.

424 The cytokine storm induced by COVID-19 could be greater in pregnant women, our  
425 study shows that some cytokines (TNF- $\alpha$ , IL-6 and CCL3) reach a higher concentration  
426 in serum of NP-COVID-19+ than in P-COVID-19+ patients, although it was only  
427 significantly higher for TNF- $\alpha$  (Figure 3a). Interestingly, we also found a highest  
428 concentration of IL-4 in the P-COVID-19+ group with a statistically difference in NP-  
429 COVID-19+ ( $p=0.01$ ) and P-COVID-19- ( $p=0.01$ ). Despite pregnancy, results indicate a  
430 similar pro-inflammatory profile in COVID-19+ patients, which could be regulated by  
431 IL-4 in pregnant women. Some reports show that the concentration of CXCL10  
432 chemokine is associated with a poor prognosis in COVID-19+ patients (20). In contrast,  
433 this study found a lower concentration in P-COVID-19+ patients, which would favor  
434 the immune response in pregnancy.

435 After analysis of the basal and leukocyte response to polyclonal stimulation, the basal  
436 concentration of cytokines is similar among groups (Figure 4), indicating that, despite  
437 COVID-19, peripheral leukocytes have a similar potential to produce cytokines. This  
438 suggests that production of cytokines in COVID-19 could depend of an alternate source  
439 such as endothelial cells. Human rIL-6 stimulus caused an increase in some cytokines  
440 such as TNF- $\alpha$ , CCL3 and CCL4, indicating that IL-6 favors synthesis of some  
441 cytokines but not an entire cytokine storm. In addition, the response in COVID-19 to  
442 IL-6 seems to be similar in the presence or absence of pregnancy, indicating that  
443 pregnancy not necessarily aggravates the pro-inflammatory responses in COVID-19. To  
444 explore if leukocytes response is limited by COVID-19, we performed a LPS or  
445 PMA/Ion stimulus, resulting in a clear pro-inflammatory response with cytokines such

446 as, TNF- $\alpha$ , CCL3, CCL4, IL-17a, CCL23 and CXCL8 in supernatant, indicating that  
447 leukocytes are not anergic. It has been proposed that an immunosuppression rather than  
448 a hyper-cytokine response in COVID-19 could support the pathophysiology (37).  
449 However, these results indicate that peripheral blood leukocytes from pregnant women  
450 with COVID are capable of expressing a similar response as a healthy pregnant woman.  
451 The main limitation of the present study is the compact number of patients. A greater  
452 number of observations are required to reach a final and more representative conclusion.  
453 However, the reproducibility and consistency of these results back our analysis.  
454 Pregnant women with or without COVID-19 control inflammation through monocytes  
455 CD39+/CD73+ maintaining higher percentages of monocytes CD39+ and lower  
456 percentage of CD73+ than NP-COVID-19+ patients. Hence, CD39/CD73 is a potential  
457 marker to monitor the evolution of COVID-19. On the other hand, unlike in the general  
458 population, D-Dimer concentrations in pregnant women are not necessarily indicative of  
459 severity or thromboembolic risk but rather a physiological state of gestation by itself.  
460 These findings help the focus for future studies on the immune profile in pregnant  
461 women with COVID-19, provides evidence about the functional immunological profile  
462 in pregnant women with COVID-19 and enriches the knowledge on the immune  
463 response that occurs during pregnancy.

464

#### 465 Contributors

466 ACV and CLM conceived and designed the study, and contributed to data analysis. ACV  
467 wrote the first version of manuscript. MGE, JCBG, LAAP, EFO, OMA, GMLGA,  
468 contributed with a critical revision of the report. MGE, JCBG, BZB, RCdLB, AHVC,  
469 AEP, RRMdO, FCS, LARG, GFP, OMA, GMLGA contributed with the clinical  
470 evaluation of patients and supervision of medical treatments and patient care. ACV,  
471 LAAP, EFO, GLCR, PMC, MTGR, JLPC, VRA, RLMS, ACC, ESR, MESR and DSM,  
472 contributed with data acquisition, analysis and/or interpretation. All authors reviewed the  
473 final version. CLM reviewed and approved the final version.

474

#### 475 Acknowledgements

476 This project was supported by the Mexican National Research Council (CONACyT),  
477 (Project No. 313494 awarded to CLM). The authors extend a gratitude to the staff at the  
478 Specialties Hospital, National Medical Center "XXI Century", Gynecology & Obstetrics  
479 Department in the General Hospital of Mexico "Dr. Eduardo Liceaga" and Gynecology  
480 & Obstetric Hospital No. 4 UMAE "Dr. Luis Castelazo Ayala".

481

#### 482 Declaration of interests

483 All authors declare no competing interests.

484

485

#### References

486

487 1. Berhan Y. What immunological and hormonal protective factors lower the risk

488 of COVID-19 related deaths in pregnant women? *J Reprod Immunol.* 2020;142:103180.

489 2. Villar J, Ariff S, Gunier RB, Thiruvengadam R, Rauch S, Kholin A, et al.

490 Maternal and Neonatal Morbidity and Mortality Among Pregnant Women With and

491 Without COVID-19 Infection: The INTERCOVID Multinational Cohort Study. *JAMA*

492 *Pediatr.* 2021.

493 3. Zambrano LD, Ellington S, Strid P, Galang RR, Oduyebo T, Tong VT, et al.

494 Update: Characteristics of Symptomatic Women of Reproductive Age with Laboratory-

495 Confirmed SARS-CoV-2 Infection by Pregnancy Status - United States, January 22-

496 October 3, 2020. *MMWR Morb Mortal Wkly Rep.* 2020;69(44):1641-7.

497 4. Delahoy MJ, Whitaker M, O'Halloran A, Chai SJ, Kirley PD, Alden N, et al.

498 Characteristics and Maternal and Birth Outcomes of Hospitalized Pregnant Women

499 with Laboratory-Confirmed COVID-19 - COVID-NET, 13 States, March 1-August 22,

500 2020. *MMWR Morb Mortal Wkly Rep.* 2020;69(38):1347-54.

501 5. PrabhuDas M, Piper JM, Jean-Philippe P, Lachowicz-Scroggins M. Immune

502 Regulation, Maternal Infection, Vaccination, and Pregnancy Outcome. *J Womens*

503 *Health (Larchmt).* 2021;30(2):199-206.

504 6. Arck PC, Hecher K. Fetomaternal immune cross-talk and its consequences for

505 maternal and offspring's health. *Nature medicine.* 2013;19(5):548-56.

506 7. Rodriguez-Morales AJ, Cardona-Ospina JA, Gutierrez-Ocampo E, Villamizar-

507 Pena R, Holguin-Rivera Y, Escalera-Antezana JP, et al. Clinical, laboratory and

508 imaging features of COVID-19: A systematic review and meta-analysis. *Travel Med*

509 *Infect Dis.* 2020;34:101623.

510 8. Petrakis D, Margina D, Tsarouhas K, Tekos F, Stan M, Nikitovic D, et al.

511 Obesity a risk factor for increased COVID19 prevalence, severity and lethality

512 (Review). *Mol Med Rep.* 2020;22(1):9-19.

513 9. Pettiroso E, Giles M, Cole S, Rees M. COVID-19 and pregnancy: A review of

514 clinical characteristics, obstetric outcomes and vertical transmission. *Aust N Z J Obstet*

515 *Gynaecol.* 2020;60(5):640-59.

516 10. Di Mascio D, Khalil A, Saccone G, Rizzo G, Buca D, Liberati M, et al.

517 Outcome of coronavirus spectrum infections (SARS, MERS, COVID-19) during

518 pregnancy: a systematic review and meta-analysis. *Am J Obstet Gynecol MFM.*

519 2020;2(2):100107.

520 11. Mardani R, Ahmadi Vasmehjani A, Zali F, Gholami A, Mousavi Nasab SD,

521 Kaghazian H, et al. Laboratory Parameters in Detection of COVID-19 Patients with



- 522 Positive RT-PCR; a Diagnostic Accuracy Study. *Arch Acad Emerg Med.*  
523 2020;8(1):e43.
- 524 12. Nicholls JM, Poon LL, Lee KC, Ng WF, Lai ST, Leung CY, et al. Lung  
525 pathology of fatal severe acute respiratory syndrome. *Lancet.* 2003;361(9371):1773-8.
- 526 13. Li T, Qiu Z, Zhang L, Han Y, He W, Liu Z, et al. Significant changes of  
527 peripheral T lymphocyte subsets in patients with severe acute respiratory syndrome. *J*  
528 *Infect Dis.* 2004;189(4):648-51.
- 529 14. Zhao Q, Meng M, Kumar R, Wu Y, Huang J, Deng Y, et al. Lymphopenia is  
530 associated with severe coronavirus disease 2019 (COVID-19) infections: A systemic  
531 review and meta-analysis. *Int J Infect Dis.* 2020;96:131-5.
- 532 15. Huang I, Pranata R. Lymphopenia in severe coronavirus disease-2019 (COVID-  
533 19): systematic review and meta-analysis. *J Intensive Care.* 2020;8:36.
- 534 16. Law HK, Cheung CY, Ng HY, Sia SF, Chan YO, Luk W, et al. Chemokine up-  
535 regulation in SARS-coronavirus-infected, monocyte-derived human dendritic cells.  
536 *Blood.* 2005;106(7):2366-74.
- 537 17. Chien JY, Hsueh PR, Cheng WC, Yu CJ, Yang PC. Temporal changes in  
538 cytokine/chemokine profiles and pulmonary involvement in severe acute respiratory  
539 syndrome. *Respirology.* 2006;11(6):715-22.
- 540 18. Chang YJ, Liu CY, Chiang BL, Chao YC, Chen CC. Induction of IL-8 release in  
541 lung cells via activator protein-1 by recombinant baculovirus displaying severe acute  
542 respiratory syndrome-coronavirus spike proteins: identification of two functional  
543 regions. *J Immunol.* 2004;173(12):7602-14.
- 544 19. Chen IY, Chang SC, Wu HY, Yu TC, Wei WC, Lin S, et al. Upregulation of the  
545 chemokine (C-C motif) ligand 2 via a severe acute respiratory syndrome coronavirus  
546 spike-ACE2 signaling pathway. *J Virol.* 2010;84(15):7703-12.
- 547 20. Huang C, Wang Y, Li X, Ren L, Zhao J, Hu Y, et al. Clinical features of patients  
548 infected with 2019 novel coronavirus in Wuhan, China. *Lancet.* 2020;395(10223):497-  
549 506.
- 550 21. Costela-Ruiz VJ, Illescas-Montes R, Puerta-Puerta JM, Ruiz C, Melguizo-  
551 Rodriguez L. SARS-CoV-2 infection: The role of cytokines in COVID-19 disease.  
552 *Cytokine Growth Factor Rev.* 2020;54:62-75.
- 553 22. Deshmane SL, Kremlev S, Amini S, Sawaya BE. Monocyte chemoattractant  
554 protein-1 (MCP-1): an overview. *J Interferon Cytokine Res.* 2009;29(6):313-26.
- 555 23. Lappalainen U, Whitsett JA, Wert SE, Tichelaar JW, Bry K. Interleukin-1beta  
556 causes pulmonary inflammation, emphysema, and airway remodeling in the adult  
557 murine lung. *Am J Respir Cell Mol Biol.* 2005;32(4):311-8.
- 558 24. Schoenborn JR, Wilson CB. Regulation of interferon-gamma during innate and  
559 adaptive immune responses. *Adv Immunol.* 2007;96:41-101.
- 560 25. Breslin N, Baptiste C, Gyamfi-Bannerman C, Miller R, Martinez R, Bernstein  
561 K, et al. COVID-19 infection among asymptomatic and symptomatic pregnant women:  
562 Two weeks of confirmed presentations to an affiliated pair of New York City hospitals.  
563 *Am J Obstet Gynecol MFM.* 2020:100118.
- 564 26. Zhao H, Bo C, Kang Y, Li H. What Else Can CD39 Tell Us? *Front Immunol.*  
565 2017;8:727.
- 566 27. Thornton P, Douglas J. Coagulation in pregnancy. *Best Pract Res Clin Obstet*  
567 *Gynaecol.* 2010;24(3):339-52.
- 568 28. Kadir RA, Kobayashi T, Iba T, Erez O, Thachil J, Kazi S, et al. COVID-19  
569 coagulopathy in pregnancy: Critical review, preliminary recommendations, and ISTH



- 570 registry-Communication from the ISTH SSC for Women's Health. *J Thromb Haemost.*  
571 2020;18(11):3086-98.
- 572 29. Vidali S, Morosetti D, Cossu E, Luisi MLE, Pancani S, Semeraro V, et al. D-  
573 dimer as an indicator of prognosis in SARS-CoV-2 infection: a systematic review. *ERJ*  
574 *Open Res.* 2020;6(2).
- 575 30. Gong X, Song L, Li H, Li L, Jin W, Yu K, et al. CT characteristics and  
576 diagnostic value of COVID-19 in pregnancy. *PLoS One.* 2020;15(7):e0235134.
- 577 31. Wang Z, Wang Z, Xiong G. Clinical characteristics and laboratory results of  
578 pregnant women with COVID-19 in Wuhan, China. *Int J Gynaecol Obstet.*  
579 2020;150(3):312-7.
- 580 32. Hedengran KK, Andersen MR, Stender S, Szecsi PB. Large D-Dimer  
581 Fluctuation in Normal Pregnancy: A Longitudinal Cohort Study of 4,117 Samples from  
582 714 Healthy Danish Women. *Obstet Gynecol Int.* 2016;2016:3561675.
- 583 33. Ferat-Osorio E, Esquivel-Callejas N, Wong-Baeza I, Aduna-Vicente R, Arriaga-  
584 Pizano L, Sanchez-Fernandez P, et al. The increased expression of TREM-1 on  
585 monocytes is associated with infectious and noninfectious inflammatory processes. *J*  
586 *Surg Res.* 2008;150(1):110-7.
- 587 34. Ferat-Osorio E, Wong-Baeza I, Esquivel-Callejas N, Figueroa-Figueroa S,  
588 Duarte-Rojo A, Guzman-Valdivia-Gomez G, et al. Triggering receptor expressed on  
589 myeloid cells-1 expression on monocytes is associated with inflammation but not with  
590 infection in acute pancreatitis. *Crit Care.* 2009;13(3):R69.
- 591 35. Cerbulo-Vazquez A, Figueroa-Damian R, Arriaga-Pizano LA, Hernandez-  
592 Andrade E, Mancilla-Herrera I, Flores-Mejia LA, et al. Pregnant women infected with  
593 pandemic H1N1pdm2009 influenza virus displayed overproduction of peripheral blood  
594 CD69+ lymphocytes and increased levels of serum cytokines. *PLoS One.*  
595 2014;9(9):e107900.
- 596 36. Antonioli L, Pacher P, Vizi ES, Hasko G. CD39 and CD73 in immunity and  
597 inflammation. *Trends Mol Med.* 2013;19(6):355-67.
- 598 37. Remy KE, Mazer M, Striker DA, Ellebedy AH, Walton AH, Unsinger J, et al.  
599 Severe immunosuppression and not a cytokine storm characterizes COVID-19  
600 infections. *JCI Insight.* 2020;5(17).  
601  
602

603 **Table S1. Percentage of leukocytes after 4 hours of medium culture in pregnant**  
 604 **and non-pregnant women with or without COVID-19**

| Leukocyte (%)       | NP-COVID-19+<br>(n=6-9)a | P-COVID-19+<br>(n=15)b | P-COVID-19-<br>(n=13)c | <i>p</i>     |
|---------------------|--------------------------|------------------------|------------------------|--------------|
| <b>Lymphocyte</b>   | 15.8±11.4                | 19.4±9.5               | 28.2±7.8               | <b>0.031</b> |
| T cell CD4+         | 55.3±8.4                 | 54.5±8.9               | 59.7±7.4               | 0.206        |
| T cell CD8+         | 35.5±9.3                 | 37.7±9.9               | 34.1±6.0               | 0.533        |
| T cell CD4+CD8+     | 0.6±0.4                  | 1.2±1.9                | 0.9±1.2                | 0.801        |
| <b>Monocytes</b>    | 2.4±1.3                  | 2.5±1.7                | 3.4±1.8                | 0.359        |
| <b>Granulocytes</b> | 81.5±12.5                | 77.8±10.4              | 68.1±9.4               | 0.058        |

605 Non-Pregnant COVID-19+ (NP-COVID-19+), Pregnant-COVID-19+ (P-COVID-19+), Pregnant-  
 606 COVID-19- (P-COVID-19-). Fisher's exact test. Significant  $p < 0.05$ . Viability  $> 90\%$ .  
 607

608 **Table S2. Surface of activation markers on leukocytes in pregnant and non-**  
 609 **pregnant women with or without COVID-19**

| Leukocyte (%)             | NP-COVID-19+<br>(n=4-9)a | P-COVID-<br>19+<br>(n=10-15)b | P-COVID-19-<br>(n=12-13)c | <i>p</i>         |
|---------------------------|--------------------------|-------------------------------|---------------------------|------------------|
| <b>T cell CD4+CD69+</b>   | 0.9±0.4                  | 4.9±13.8                      | 0.4±0.2                   | a vs. c<br>0.020 |
| <b>T cell CD8+CD69+</b>   | 5.1±4.2                  | 5.3±4.6                       | 2.4±1.3                   | 0.076            |
| <b>T cell CD4+HLA-DR+</b> | 5.2±2.5                  | 5.4±3.6                       | 6.2±2.0                   | 0.509            |
| <b>T cell CD8+HLA-DR+</b> | 10.5±9.5                 | 11.2±7.2                      | 14.8±6.1                  | 0.121            |

610 Non-Pregnant COVID-19+ (NP-COVID-19+), Pregnant-COVID-19+ (P-COVID-19+), Pregnant-  
 611 COVID-19- (P-COVID-19-). BMI; Body Mass Index. NLR; Neutrophil/Lymphocyte Ratio. Kruskal-  
 612 Wallis test. Significant  $p < 0.05$ . Media±SD.  
 613  
 614  
 615  
 616  
 617  
 618  
 619  
 620  
 621  
 622  
 623  
 624  
 625  
 626  
 627  
 628  
 629  
 630  
 631  
 632  
 633

634 **Table S3. Cytokine-positive leukocyte percentage after 4 hours of polyclonal**  
 635 **stimulus in pregnant and non-pregnant women with or without COVID-19**

| Leukocyte (%)          | NP-COVID-19<br>+<br>(n=5-6)a | P-COVID-19 +<br>(n=12-15)b | P-COVID-19<br>-<br>(n=13)c | <i>p</i> |
|------------------------|------------------------------|----------------------------|----------------------------|----------|
| <b>T cell CD4+TNF+</b> |                              |                            |                            |          |
| <b>Medium</b>          | 0.4±0.2                      | 0.9±1.2                    | 0.7±1.4                    | 0.222    |
| <b>IL-6</b>            | 3.5±6                        | 0.4±0.4                    | 0.6±0.6                    | 0.290    |
| <b>PMA/Ion</b>         | 8.4±7.3                      | 9.9±8.2                    | 14.6±16.7                  | 0.692    |
| <b>T cell CD8+TNF+</b> |                              |                            |                            |          |
| <b>Medium</b>          | 1.4±1.0                      | 3.7±8.1                    | 0.5±0.7                    | 0.118    |
| <b>IL-6</b>            | 2.3±4.3                      | 1.3±3.0                    | 0.6±1.0                    | 0.337    |
| <b>PMA/Ion</b>         | 4.6±2.5                      | 8.3±8.1                    | 11.2±9.6                   | 0.210    |
| <b>Monocyte TNF+</b>   |                              |                            |                            |          |
| <b>Medium</b>          | 5.4±5.2                      | 3.7±4.1                    | 1.9±2.1                    | 0.218    |
| <b>IL-6</b>            | 4.6±2.7                      | 4.5±4.8                    | 4.4±3.2                    | 0.814    |
| <b>LPS</b>             | 38.6±30.1                    | 43.0±28.9                  | 21.2±12.9                  | 0.105    |
| <b>Monocyte IL-8+</b>  |                              |                            |                            |          |
| <b>Medium</b>          | 14.1±10.6                    | 13.9±9.6                   | 22.3±12.5                  | 0.165    |
| <b>IL-6</b>            | 24.3±15.6                    | 17.6±12.6                  | 26.1±14.7                  | 0.274    |
| <b>LPS</b>             | 44.4±35.7                    | 50.4±26.7                  | 39.6±16.2                  | 0.540    |

636 NP-COVID-19+; Non-Pregnant COVID-19+. P-COVID-19+; Pregnant-COVID-19+. P-COVID-19-;  
 637 Pregnant-COVID-19-. Fisher's exact test. Significant *p*<0.05.

638  
 639  
 640  
 641  
 642  
 643  
 644

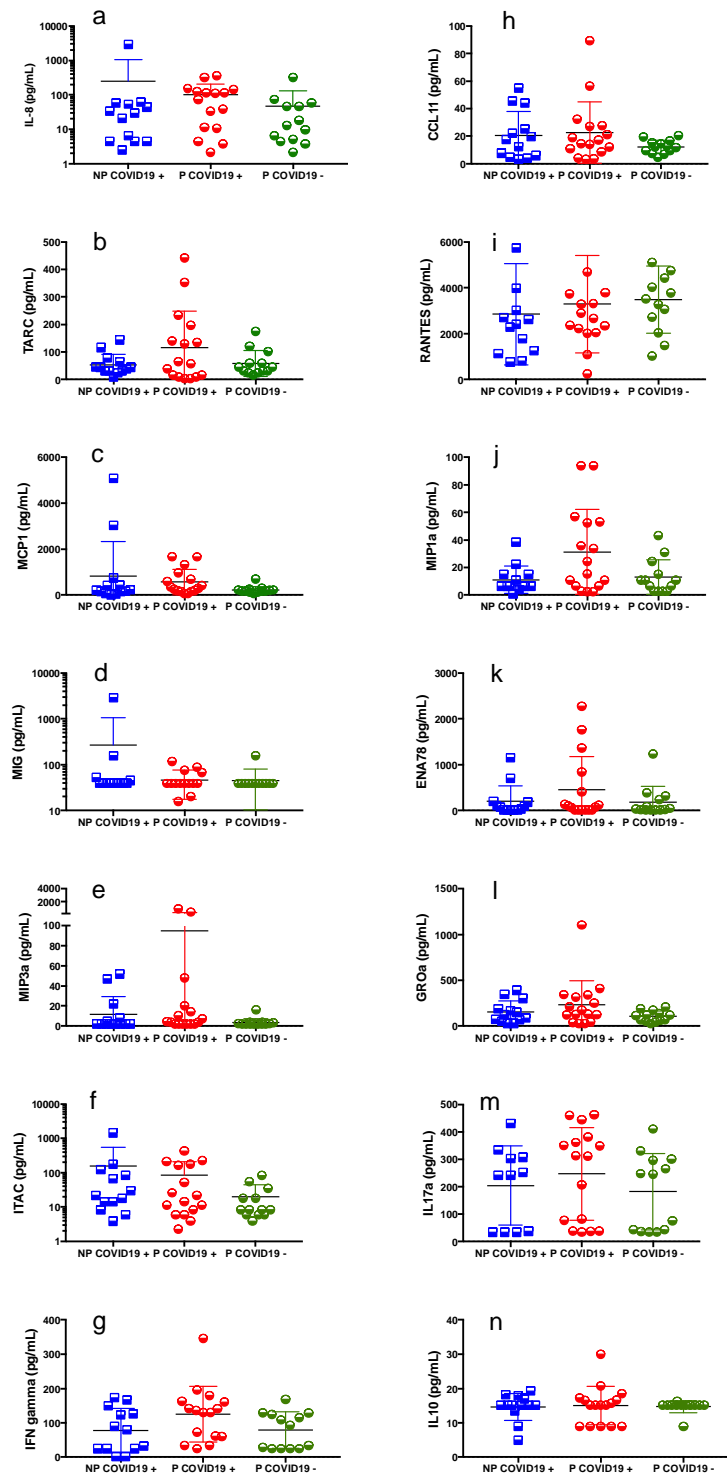

645  
646 **Figure S1. Similar Cytokine/Chemokine serum concentration in pregnant and non-pregnant**  
647 **women with or without COVID-19.** Serum was isolated and cytokine/chemokines concentration was  
648 determined using bead-based immunoassays as described in methods. Results are expressed as mean±SD.  
649 Significance value was  $p < 0.05$ . Kruskal-Wallis and Dunn's multiple comparisons test was calculated.  
650 Non-Pregnant COVID-19 positive (NP-COVID-19+, n=13). Pregnant-COVID-19 positive (P-COVID-  
651 19+, n=15-16). Pregnant-COVID-19 negative (P-COVID-19-, n=13).

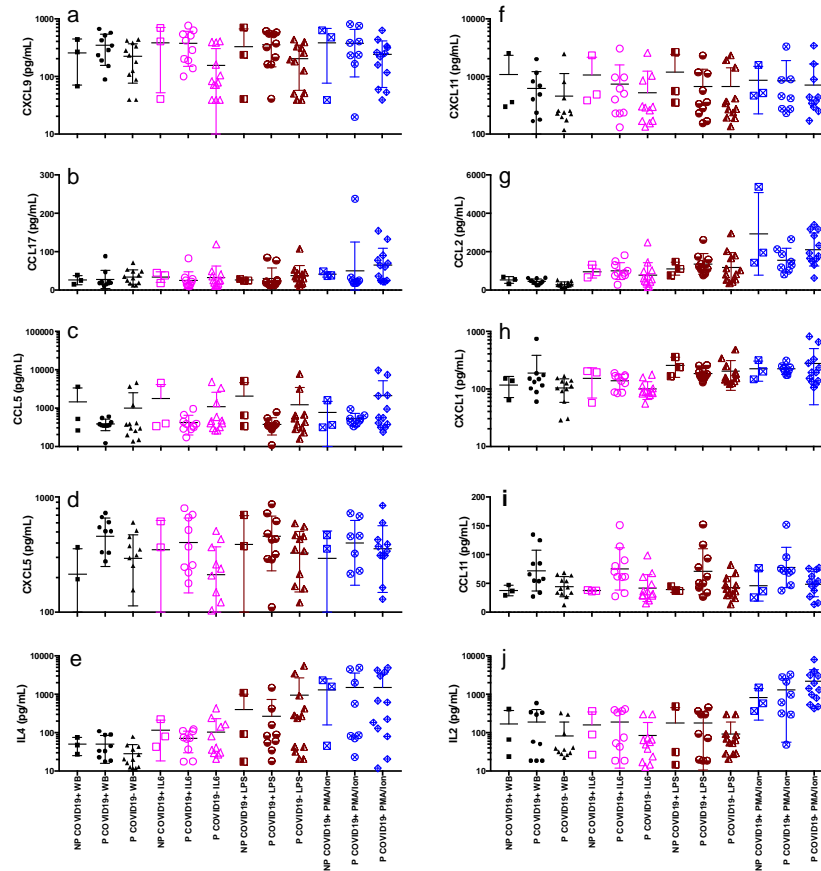

652  
 653 **Figure S2. Similar Cytokine/Chemokine response after 4 hours of culture with polyclonal stimulus**  
 654 **in pregnant and non-pregnant women with or without COVID-19.** Supernatant was collected and  
 655 cytokines/ chemokines concentration was determined using bead-based immunoassays as described in  
 656 methods. Results are expressed as mean±SD. Significance value was  $p < 0.05$ . Kruskal-Wallis and Dunn's  
 657 multiple comparisons test was calculated. Non-Pregnant COVID-19 positive (NP-COVID-19+, n=3).  
 658 Pregnant-COVID-19 positive (P-COVID-19+, n=9-10). Pregnant-COVID-19 negative (P-COVID-19-,  
 659 n=12). WB, Whole Blood.
